# Supplementary material
Source: publisher figshare collection journal article supplement (https://sage.figshare.com/ndownloader/files/22827128)
Supplement: Supplementary file 1 [file 22827128]

**APPENDIX**

**Table B: Change in Crime Rates and the Refugee Population for Counties with a Large Refugee Population –IV Results**

|  | **Using Arrest Data** | | | **Using Offense Data** | | |
| --- | --- | --- | --- | --- | --- | --- |
| **Dependent Variable:** | **All** | **Violent** | **Property** | **All** | **Violent** | **Property** |
| **Crimes** | **Crimes** | **Crimes** | **Crimes** | **Crimes** | **Crimes** |
| **Δ(Refugees/1,000 people)** | -6.214 | -3.157 | -3.058 | 3.974 | -1.767 | 5.741 |
|  | (7.297) | (3.397) | (4.073) | (13.629) | (3.953) | (11.224) |
| Δ(Population) | 0.000 | 0.000 | -0.000 | -0.012** | 0.000 | -0.012*** |
|  | (0.003) | (0.002) | (0.002) | (0.005) | (0.002) | (0.003) |
| Δ(Share Male 18-25 Years Old) | 0.281 | 0.227 | 0.054 | -0.640 | 0.136 | -0.776 |
|  | (0.562) | (0.269) | (0.314) | (1.090) | (0.271) | (0.947) |
| Δ(Share Blacks) | 137.322 | 55.134 | 82.244 | -196.373 | -7.292 | -189.081 |
|  | (127.835) | (60.772) | (72.425) | (241.256) | (65.909) | (209.276) |
| Δ(Share Hispanics) | 25.195 | -12.510 | 37.671 | -491.142*** | -88.997*** | -402.145** |
|  | (80.851) | (39.549) | (46.974) | (173.831) | (32.656) | (160.935) |
| Δ(Population Density) | 0.006 | 0.004 | 0.002 | -0.027 | -0.004 | -0.024 |
|  | (0.008) | (0.004) | (0.005) | (0.018) | (0.003) | (0.017) |
| Δ(Unemployment Rate) | -0.122 | -0.085 | -0.037 | -0.031 | -0.027 | -0.004 |
|  | (0.189) | (0.085) | (0.110) | (0.357) | (0.097) | (0.303) |
| Δ(Median HH Income in thousands) | -64.089 | -27.253 | -36.797 | -42.398 | -31.274 | -11.124 |
|  | (82.385) | (36.309) | (48.790) | (139.512) | (35.522) | (128.756) |
| Δ(Poverty Rate) | -0.110 | -0.025 | -0.085* | -0.122 | -0.034 | -0.088 |
|  | (0.074) | (0.033) | (0.047) | (0.164) | (0.033) | (0.161) |
| County Fixed-Effects | Y | Y | Y | Y | Y | Y |
| Year Fixed-Effects | Y | Y | Y | Y | Y | Y |
| Observations | 1,212 | 1,212 | 1,212 | 1,212 | 1,212 | 1,212 |
|  |  |  |  |  |  |  |
| *First-Stage Results* |  |  |  |  |  |  |
| IV | 2.4233 | | | | | |
|  | (2.1407) | | | | | |
| F-stat | 1.2810 | | | | | |
| R-squared | 0.1493 | | | | | |

**Notes:** All results are population weighted. Robust standard errors are clustered at the county level and shown in parentheses. *** p<0.01, ** p<0.05, * p<0.1.
